# Supplementary material
Source: Springer Nature journal article supplement (https://www.springermedizin.de/resource/supplementary/12884_2013_1086_MOESM6_ESM.pdf/9458810)

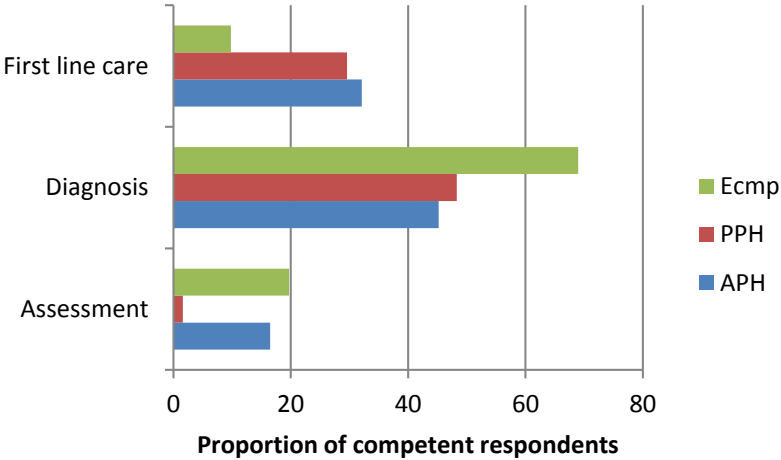

Supplement: MOESM6 [file 9458810]
